# Supplementary material for: Effects of Titanium–Silica Oxide on Degradation Behavior and Antimicrobial Activity of Poly (Lactic Acid) Composites
Source: Polymers (Basel). 2022 Aug 14;14(16):3310. doi: 10.3390/polym14163310 (PMC9416649; doi:10.3390/polym14163310)
Supplement: Supplementary file 1 [file polymers-14-03310-s001.zip › polymers-1840281-supplementary.pdf]

# 1. Results and discussion section

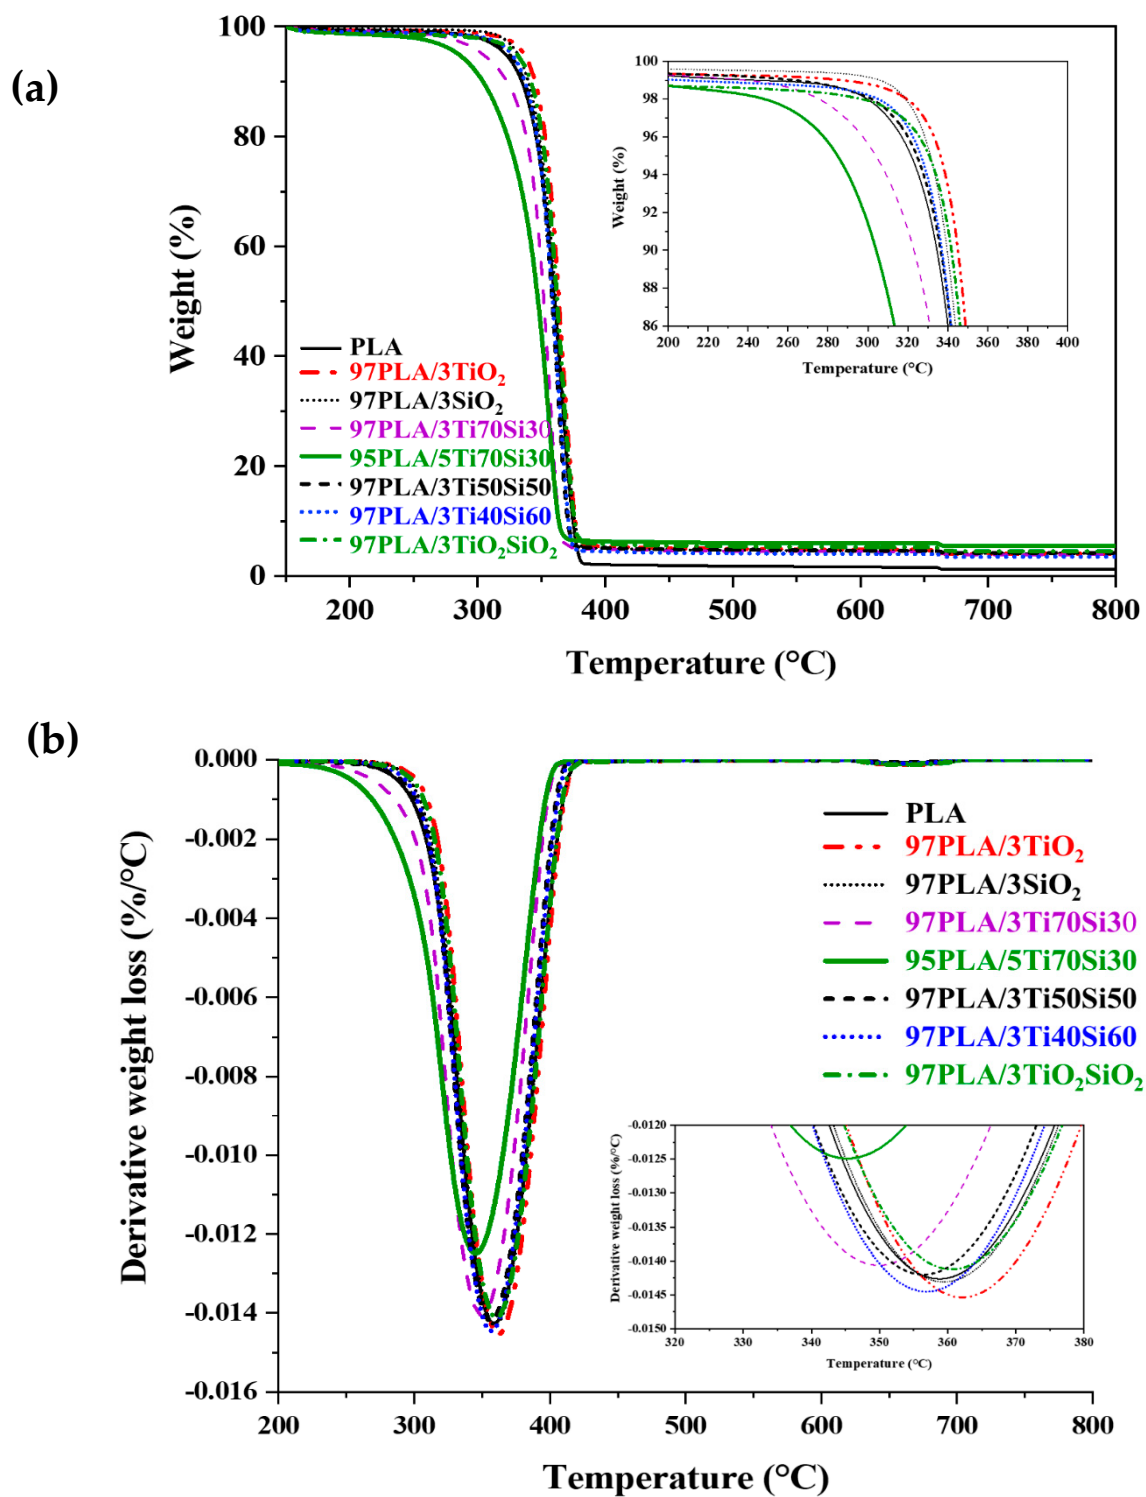

**Figure s1.** Curve of (a) TGA thermogram (b) DTG Thermogram of PLA, PLA/TiO<sub>2</sub>, PLA/SiO<sub>2</sub>, PLA/Ti<sub>x</sub>Si<sub>y</sub>, and PLA/TiO<sub>2</sub>SiO<sub>2</sub> composites.

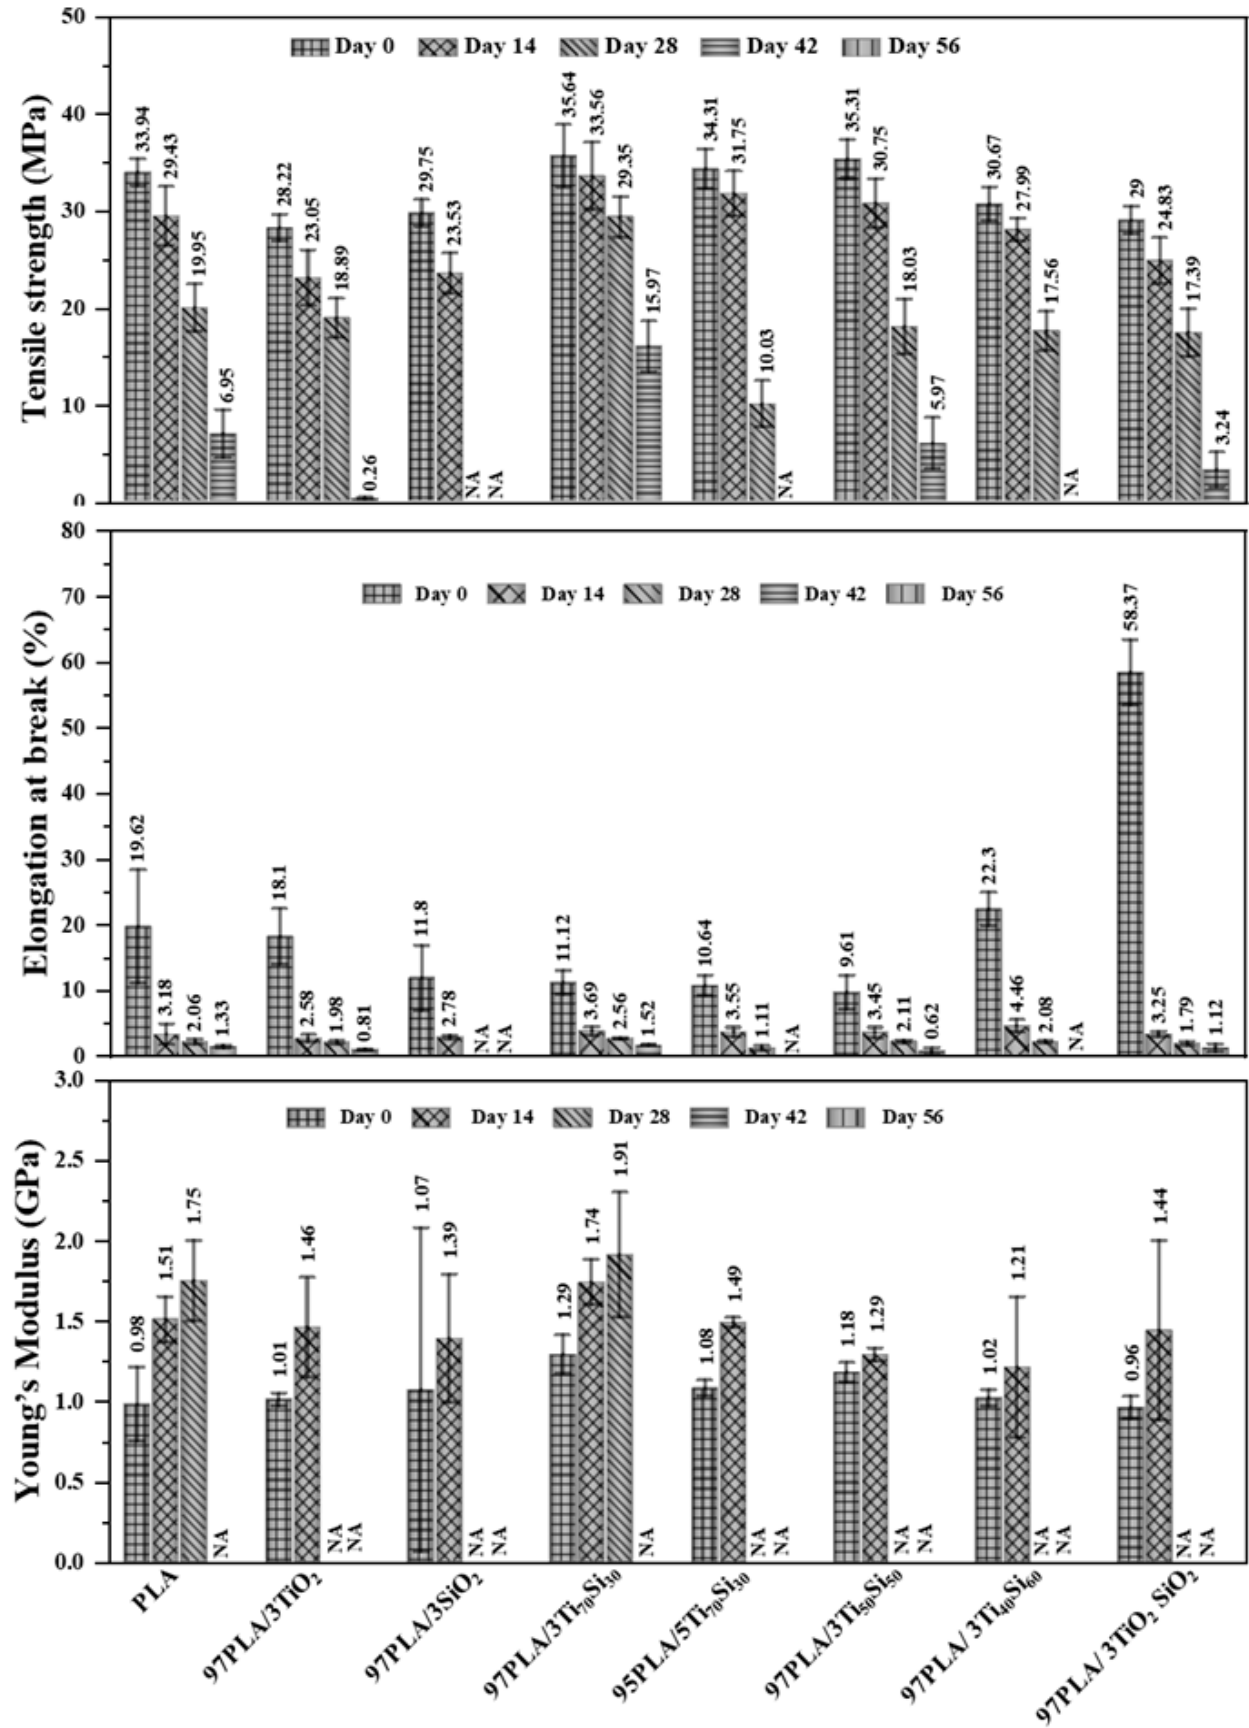

**Figure s2.** The changes in tensile properties of PLA, PLA/TiO<sub>2</sub>, PLA/SiO<sub>2</sub> and PLA/TiSi<sub>3</sub> composite films after different period of *in vitro* degradation.
